# Supplementary material
Source: publisher site journal article supplement (https://www.spandidos-publications.com/6783/downloadSupplementary)
Supplement: Supplementary file 1 [file downloadSupplementary]

## Sheet: COX 95
Table SIII. Prognosis-related genes of GBM patients identified by Univariate Cox regression analysis.
Gene symbol	HR	L95CI	H95CI	P-value
HOXD10	1.14748	1.00306	1.31268	0.0450144
HOXC11	1.17011	1.01912	1.34347	0.0258364
HOXC10	1.14099	1.0264	1.26837	0.0145819
HOXC13	1.21375	1.05786	1.39261	0.00574523
EN1	1.16418	1.01	1.34189	0.0359663
HOXD11	1.21773	1.0092	1.46936	0.0398329
GATA4	1.17461	1.01511	1.35918	0.0306628
HOXB7	1.14417	1.00898	1.29748	0.0357912
HOXB3	1.13675	1.01965	1.2673	0.0208408
POSTN	1.07427	1.00112	1.15277	0.0464647
HOXB5	1.24578	1.04645	1.4831	0.013501
HOXC6	1.22653	1.03997	1.44656	0.0152879
HOXD12	1.34774	1.04168	1.74373	0.0231665
MMP13	1.23901	1.07575	1.42704	0.00295062
HOXA13	0.82815	0.706143	0.971238	0.0204032
HOXB2	1.16482	1.04255	1.30143	0.00700771
HOXB9	1.37729	1.10567	1.71565	0.00428748
CHI3L1	1.0904	1.01161	1.17532	0.023722
NLRP11	0.742009	0.562925	0.978066	0.0342312
IGFBP2	1.19989	1.06144	1.35639	0.00357674
CXCL13	1.1416	1.02303	1.27391	0.0179359
C5orf46	1.49803	1.21518	1.84672	0.000153512
OR4N2	0.799612	0.685704	0.932441	0.00434364
VGLL2	1.26355	1.03287	1.54574	0.0229409
CA9	1.11911	1.0067	1.24407	0.0371902
ABCC3	1.12246	1.01322	1.24347	0.0270077
ABCA13	1.17515	1.01594	1.3593	0.0297852
TGFBI	1.13902	1.00368	1.29261	0.0437007
LOXHD1	2.18647	1.08409	4.4098	0.0288488
KLK5	1.68239	1.08948	2.59797	0.0189499
TREM1	1.13537	1.0155	1.26938	0.0257378
COL8A1	1.13959	1.02918	1.26185	0.0119672
SH2D5	1.27184	1.04256	1.55156	0.0177469
TIMP4	0.862043	0.760137	0.977612	0.0207382
KRT31	1.80301	1.05131	3.09218	0.0322127
LRRC15	1.22969	1.06739	1.41666	0.00419699
CD70	1.23424	1.04976	1.45115	0.0108398
FCGR2B	1.16241	1.02569	1.31735	0.018409
LBHD2	2.32652	1.06315	5.09117	0.0345817
IRX3	1.20255	1.00262	1.44235	0.0467929
ISLR2	1.19248	1.01596	1.39968	0.0312685
PDPN	1.14139	1.00256	1.29944	0.0456453
NRXN3	1.21589	1.05729	1.39828	0.00612054
EPHA8	1.72222	1.02076	2.90571	0.0416549
RGS4	1.17834	1.04282	1.33146	0.00847141
GREM2	1.28239	1.0095	1.62905	0.0416071
LOX	1.12497	1.00997	1.25306	0.032332
SYT5	1.17493	1.01179	1.36436	0.0345399
PTX3	1.20477	1.07267	1.35314	0.0016676
HS3ST2	1.21473	1.04796	1.40805	0.00983204
NELL1	1.2047	1.04624	1.38717	0.00965035
HTRA4	1.38805	1.00599	1.91521	0.0459013
CDH16	1.82801	1.00195	3.33512	0.0492621
MXRA5	1.17981	1.04905	1.32686	0.00579702
ANXA2	1.19891	1.02776	1.39857	0.0209775
CRYGN	2.61582	1.40821	4.859	0.00233907
SDR16C5	1.35457	1.01794	1.80253	0.0373484
MDK	1.36078	1.12202	1.65036	0.00175082
LINGO2	1.37449	1.05474	1.79118	0.0185491
HMGA2	1.10744	1.00591	1.21923	0.0375287
KHDRBS2	0.665112	0.499689	0.885297	0.00519032
STEAP3	1.27154	1.0971	1.47371	0.00141829
CREB3L3	2.18333	1.04543	4.55975	0.0376891
FMOD	1.099	1.002	1.2054	0.0452499
CAMK4	1.23687	1.01895	1.50138	0.0315669
TSHR	0.851562	0.745578	0.972611	0.0178132
CLEC5A	1.22046	1.04818	1.42107	0.0102895
MMP14	1.25579	1.06658	1.47856	0.00626533
MMP2	1.22507	1.03035	1.45658	0.0215304
SINHCAF	0.727609	0.597176	0.886532	0.00160575
VWA7	1.42368	1.04671	1.93642	0.0243955
CYP1A1	2.16789	1.13814	4.12931	0.0185947
SERPINE1	1.12534	1.00437	1.26088	0.0418455
GATA3	1.26502	1.03238	1.55008	0.0233698
ADRA1B	1.29085	1.01068	1.64869	0.0408527
PAK6	1.30051	1.06056	1.59474	0.0115698
ACP7	1.45446	1.07248	1.97249	0.0159464
RETN	1.62453	1.21364	2.17454	0.00110859
SERPINH1	1.23308	1.01324	1.50062	0.0365053
STX1A	1.33271	1.08197	1.64155	0.00691658
FN1	1.22312	1.03984	1.4387	0.0150299
RPE65	0.810455	0.701549	0.936266	0.00431143
PCOLCE	1.14115	1.01352	1.28485	0.0291235
HTR6	1.42563	1.03715	1.95964	0.0289141
COL6A2	1.12091	1.01015	1.24382	0.0315409
EMP3	1.18738	1.02486	1.37567	0.0221992
CNTN3	0.853856	0.731514	0.996659	0.0452444
F2RL2	1.21127	1.04161	1.40856	0.0127945
NCDN	1.24705	1.00029	1.55467	0.0496951
ETV4	1.18016	1.04105	1.33785	0.0096342
FBXO39	1.40934	1.09615	1.81202	0.00745339
B3GNT4	1.57669	1.06472	2.33484	0.0230246
WNT8A	2.77267	1.09554	7.0173	0.0313532
MSTN	0.817934	0.730995	0.915214	0.000456244
VSTM2L	1.15952	1.01062	1.33034	0.0347994
TCEAL6	1.21224	1.03167	1.42442	0.0193448
NMB	0.84318	0.730942	0.972652	0.0192617
PTPRN	1.24933	1.10812	1.40854	0.0002753
HS3ST3A1	1.20802	1.04257	1.39974	0.0119161
TNFRSF12A	1.18163	1.00894	1.38388	0.0384228
KCNS1	1.18931	1.00661	1.40519	0.0416156
PRRG3	1.24051	1.04901	1.46697	0.0117618
S100A8	1.11	1.00048	1.23151	0.0489468
SERPINA5	1.1771	1.03386	1.34018	0.0137775
COL5A1	1.17395	1.04879	1.31405	0.00530061
MICAL2	1.33916	1.12467	1.59457	0.00104113
CLEC18C	1.63406	1.15454	2.31275	0.00559236
CD248	1.1995	1.00369	1.43352	0.0454538
KLK10	1.99717	1.08404	3.67947	0.0265012
TNFRSF9	1.337	1.01669	1.75822	0.0376685
SOCS1	1.21161	1.00213	1.46487	0.0474892
TIMP1	1.20645	1.06643	1.36486	0.0028665
GPR68	1.40384	1.07177	1.83879	0.013766
BICDL1	1.41199	1.14905	1.73509	0.00103265
GPRASP1	1.3033	1.0586	1.60456	0.0125363
SYN3	0.81852	0.675418	0.991942	0.0411036
CEP170B	1.25767	1.01751	1.5545	0.0339607
ZNF560	0.753198	0.6321	0.897496	0.00152833
DLGAP1	0.848444	0.727251	0.989834	0.0366268
ITPKA	1.51531	1.1886	1.93182	0.000795304
C2CD4C	1.2415	1.0162	1.51674	0.0342341
SPINK9	3.35743	1.23313	9.14123	0.0177873
CLDN16	2.52332	1.25921	5.05644	0.00905778
MYH13	2.38486	1.1081	5.13273	0.0262546
TMEM233	1.32128	1.09866	1.58901	0.00308129
KIAA0040	1.19875	1.00962	1.42332	0.0385236
ABCC12	1.30778	1.01104	1.69162	0.0409935
TENM2	1.15534	1.01881	1.31018	0.0244277
PAK1	1.42537	1.05331	1.92886	0.0216492
THEM5	1.47611	1.08908	2.00068	0.0120727
ANO4	1.22527	1.01959	1.47245	0.030243
TNFSF14	1.27753	1.08075	1.51015	0.00410673
TAGLN2	1.19686	1.01284	1.41432	0.034877
ITGB3	1.23282	1.02109	1.48844	0.0294755
C1QTNF1	1.16647	1.01372	1.34223	0.0315308
CLSTN2	0.883437	0.781987	0.998049	0.0464432
APCDD1L	1.17218	1.03522	1.32726	0.0122133
SLAMF6	1.31129	1.01511	1.69387	0.0380053
PGBD5	1.38615	1.11757	1.71926	0.00296274
BEST3	0.781021	0.671896	0.907869	0.00128763
MTHFD2	0.678805	0.538181	0.856174	0.00107165
C1orf226	0.770924	0.61457	0.967055	0.0244724
EGFLAM	1.24575	1.03121	1.50492	0.0226854
TSPAN6	0.79907	0.640963	0.996176	0.0461499
IKBIP	1.46707	1.09766	1.9608	0.00961007
CD1D	1.31526	1.01999	1.69601	0.0346423
ITGA5	1.32637	1.0829	1.62457	0.00633915
DNAJA4	1.29564	1.00742	1.66633	0.0436395
LPA	1.71015	1.00773	2.90217	0.0467573
SYNJ2	1.22067	1.01683	1.46537	0.0324311
LILRB3	1.28677	1.06967	1.54793	0.00748771
AGBL4	1.30464	1.0264	1.6583	0.0297901
LYNX1	1.35807	1.10414	1.67041	0.00375662
POM121L2	0.319288	0.106607	0.956272	0.0413649
AEBP1	1.25544	1.10932	1.42081	0.000314181
CHST9	0.850486	0.759525	0.95234	0.00501441
TTC22	1.79314	1.10351	2.91375	0.0183932
LRRC73	1.41802	1.07315	1.87374	0.014031
ELAPOR1	1.27036	1.03449	1.56001	0.0224015
TRABD2A	1.67559	1.2699	2.21087	0.000263006
LOXL1	1.36552	1.18298	1.57623	2.08955e-05
DPP10	0.891649	0.798222	0.996012	0.0422827
CDCP1	1.19917	1.02168	1.40749	0.026252
MRC2	1.1876	1.00191	1.40772	0.0474893
EN2	1.3219	1.11621	1.5655	0.00122076
SH3RF2	1.85232	1.31982	2.59967	0.000364413
DENND2D	1.22781	1.00075	1.5064	0.0491715
GPR1	1.28055	1.08176	1.51586	0.00406492
COL22A1	1.32571	1.15941	1.51586	3.74377e-05
FABP5	1.14913	1.021	1.29334	0.0211947
ADAMTS15	0.852856	0.735988	0.988281	0.0342826
SYT12	1.2537	1.03193	1.52315	0.0228247
IQSEC2	1.35737	1.05503	1.74634	0.017471
PANX2	1.34461	1.05423	1.71497	0.0170585
MCTP1	1.28018	1.0341	1.58483	0.0233406
SLC40A1	0.78622	0.651191	0.949249	0.0123595
KLC3	2.59259	1.16926	5.74855	0.019035
MYO1G	1.25886	1.05427	1.50316	0.0109601
RARRES1	1.19057	1.05423	1.34455	0.00493998
EPN3	1.54407	1.04469	2.28218	0.0293108
PLCH1	1.35473	1.10806	1.65631	0.00307099
CYGB	1.33092	1.1279	1.57049	0.000711174
LILRA6	1.34417	1.07366	1.68284	0.00988201
FCN3	1.36617	1.07518	1.7359	0.0106747
RAB15	1.36338	1.04479	1.77913	0.0224532
RAB38	1.38498	1.06314	1.80424	0.0157893
TMEM171	1.48675	1.07976	2.04716	0.0150919
PTPN7	1.3188	1.03975	1.67274	0.022528
PXDN	1.23574	1.05067	1.45341	0.0105549
CCDC73	0.382651	0.168721	0.867832	0.0214904
HAS1	1.54471	1.18212	2.01851	0.00144391
CD276	1.54841	1.13036	2.12108	0.00646641
ANTXR2	1.28806	1.0081	1.64575	0.0429171
SDC1	1.18793	1.03935	1.35776	0.0115355
SLC25A22	1.50846	1.10502	2.05919	0.00963022
CLCF1	1.26605	1.06665	1.50273	0.00697925
TNIP3	1.56371	1.03998	2.35118	0.0316863
RBP1	1.16968	1.0362	1.32036	0.0112411
CACNB2	1.24865	1.02459	1.5217	0.0277563
KCNC4	1.37843	1.06349	1.78663	0.0153056
AREG	1.39019	1.15917	1.66726	0.00038112
PLBD1	1.234	1.01172	1.50511	0.0379908
STEAP1	1.19641	1.03508	1.38288	0.0152429
EMILIN2	1.22806	1.04933	1.43723	0.0104669
EVPL	1.65587	1.04809	2.61609	0.0306746
SLC43A3	1.81396	1.32412	2.48501	0.000208796
COL6A1	1.21192	1.05176	1.39647	0.00786582
KCNH6	2.2183	1.22398	4.02036	0.00863608
ARSJ	1.16301	1.01198	1.33659	0.0333587
KRT1	2.12694	1.05498	4.28812	0.0348953
CHST1	1.23775	1.03128	1.48555	0.0219784
DOK2	1.25356	1.02358	1.53521	0.0288671
MMP19	1.15024	1.00802	1.31254	0.0376602
PCDHGB4	0.667022	0.492008	0.904292	0.00911055
TREML2	1.5752	1.11531	2.22473	0.00989432
OSMR	1.37709	1.17419	1.61505	8.33886e-05
AKNAD1	0.763125	0.599703	0.97108	0.0279033
IGFBP4	1.25684	1.03523	1.52589	0.0208975
CLEC2B	1.1855	1.00209	1.40247	0.047219
TNNT1	1.26433	1.03942	1.53792	0.0189357
CYP2E1	0.725198	0.544079	0.96661	0.0284083
LMTK2	1.33948	1.01075	1.77512	0.041912
EVC2	1.25401	1.03508	1.51924	0.0207674
PDIA4	1.63448	1.23721	2.15931	0.000543868
FAP	1.21112	1.02622	1.42934	0.023437
LMO7	1.40367	1.04722	1.88146	0.0232911
MRAP2	1.16837	1.00617	1.35671	0.0412905
CERCAM	1.38365	1.05942	1.8071	0.0171401
MASP1	0.867584	0.753806	0.998536	0.0476598
ACTL6A	0.706258	0.506744	0.984324	0.0400488
FNDC11	1.6693	1.21018	2.30261	0.00179334
NSUN7	1.28886	1.03726	1.60148	0.0220122
PRR33	1.61944	1.16016	2.26053	0.00461163
TAC4	0.656789	0.439982	0.98043	0.0397194
CETP	0.716095	0.535221	0.958094	0.0245659
SPON2	1.21048	1.02923	1.42364	0.0209963
FOLR3	1.71784	1.11876	2.63774	0.0134051
SH2D4A	1.34553	1.10073	1.64477	0.00377111
PHLDA2	1.23883	1.04637	1.46669	0.0129128
CD300E	1.33868	1.11655	1.60499	0.00162773
RUNX1	1.26578	1.05076	1.52481	0.013092
SLC2A10	1.32778	1.08126	1.63049	0.00681903
CD151	1.23304	1.00223	1.51701	0.047587
PLEKHG5	1.29633	1.01074	1.66261	0.04094
SNCAIP	0.755357	0.61836	0.922707	0.00599938
BMP1	1.54618	1.16751	2.04767	0.0023615
CATSPER1	1.47397	1.0566	2.05621	0.0223662
ZNF540	0.6186	0.396127	0.966018	0.0346874
IQSEC1	1.35708	1.0287	1.7903	0.0307616
POGLUT3	1.40883	1.10695	1.79302	0.00533894
CDHR2	1.32081	1.02981	1.69405	0.0284323
FAM241B	1.26854	1.02949	1.56309	0.0255644
MMP11	1.30659	1.09165	1.56385	0.00354309
RUNDC3B	0.760081	0.58047	0.995268	0.046103
FBXO27	1.30014	1.02078	1.65596	0.0334525
PDLIM1	1.24914	1.01854	1.53195	0.032649
PTK2B	1.26656	1.01262	1.58418	0.038472
ADM	1.1317	1.0097	1.26843	0.0335159
SLIT2	1.17363	1.00787	1.36666	0.039321
TMEM100	0.865673	0.764691	0.979992	0.0226474
NXF3	1.63581	1.07546	2.48814	0.0214523
RIPOR3	1.19953	1.02813	1.39951	0.0207476
STEAP2	1.29134	1.11272	1.49863	0.000762258
MYD88	1.63452	1.15543	2.31226	0.00549888
NKG7	1.30426	1.02498	1.65964	0.0307202
MSN	1.36884	1.08335	1.72957	0.00851825
EEF1A1	0.707045	0.535682	0.933226	0.0143662
AGTR1	1.28245	1.04258	1.57751	0.0185425
TOLLIP	1.62242	1.07387	2.45118	0.0215352
AOC1	1.71588	1.01074	2.91294	0.0455501
PPL	1.1747	1.02682	1.34387	0.0189967
CTNNA3	0.853425	0.734486	0.991624	0.0384708
YWHAG	1.68465	1.17118	2.42322	0.00492554
EMILIN1	1.19044	1.0194	1.39019	0.0276139
SEZ6L2	1.17716	1.02566	1.35103	0.0203158
SP6	1.32483	1.04449	1.68042	0.0204069
GPR39	1.31042	1.04513	1.64304	0.019158
BARD1	0.684615	0.474028	0.988756	0.0433571
RGS14	1.39678	1.12732	1.73064	0.0022434
FERMT1	0.845024	0.751906	0.949675	0.00470209
ZIC4	1.24148	1.00116	1.5395	0.0487832
C1RL	1.23241	1.04907	1.44778	0.0109929
CALCRL	0.849468	0.735649	0.980898	0.0262342
MYO15A	1.59375	1.11443	2.27923	0.0106636
PLK2	1.35136	1.11209	1.6421	0.00245715
EFEMP2	1.43296	1.17216	1.75177	0.000448506
RARRES2	1.1988	1.08053	1.33	0.00062267
BFSP1	1.48381	1.05782	2.08135	0.0222827
PDLIM4	1.17584	1.05486	1.31069	0.00345574
HK3	1.17562	1.01016	1.36819	0.0365636
SLC46A2	1.92315	1.13729	3.25203	0.0146889
BGN	1.20184	1.00289	1.44026	0.0464572
TNFRSF11B	1.15367	1.00531	1.32391	0.0418141
SLC16A3	1.23323	1.03807	1.46508	0.0170761
PHETA2	1.40341	1.10018	1.79022	0.00635943
SMAGP	1.33602	1.05625	1.68989	0.0156732
LAX1	1.52121	1.02148	2.26542	0.0389664
FXYD5	1.30136	1.03606	1.63459	0.0235401
RNF135	1.38352	1.03586	1.84786	0.0279087
IFI44L	0.875724	0.772225	0.993095	0.0386462
FAM83F	2.52155	1.26373	5.03133	0.00868901
ANK1	1.43375	1.16208	1.76893	0.000775418
MAML2	0.744307	0.5567	0.995137	0.0462765
NIPAL1	1.80234	1.0534	3.08375	0.03157
VENTX	1.31752	1.06989	1.62246	0.00943426
CABP4	1.35419	1.02224	1.79394	0.0345778
RELL2	1.4224	1.00739	2.00839	0.0453089
TMTC1	1.23585	1.00443	1.52058	0.0453133
PTPN4	0.606424	0.387401	0.949275	0.0286954
IL2RB	1.34421	1.06466	1.69718	0.0128958
P3H2	1.20575	1.00059	1.45298	0.0492855
BCL3	1.30218	1.08861	1.55764	0.00386535
PDE6H	2.34125	1.08761	5.03992	0.0296562
ABCC8	0.86327	0.747623	0.996807	0.0451188
MARVELD1	1.48525	1.17619	1.87552	0.000889639
LAMB1	1.17341	1.0123	1.36016	0.0338216
BNC2	1.1972	1.01602	1.41069	0.0315682
AACS	1.7767	1.1491	2.74706	0.00973663
GPR84	1.24312	1.00471	1.53811	0.0451572
PPM1L	0.78264	0.61357	0.998297	0.048417
CORO2A	1.30804	1.04619	1.63543	0.0184663
PTPRN2	1.59359	1.24581	2.03846	0.000207535
NXT2	0.747833	0.561248	0.996447	0.0472259
LOXL4	1.28064	1.09992	1.49106	0.00143759
RAB27A	1.27601	1.01246	1.60815	0.0389339
HR, hazard ratio; L95CI, lower 95% confidence interval; H95CI, higher 95% confidence interval.
